# Supplementary material
Source: Royal Society of Chemistry journal article supplement (doi:10.1039/d6fo00793g)
Supplement: d6fo00793g1.pdf [file d6fo00793g1.pdf]

# Consumption of an anthocyanin-rich extract increases circulating BDNF and *BDNF* gene expression in healthy subjects consuming a high fat meal

## Supplementary figures

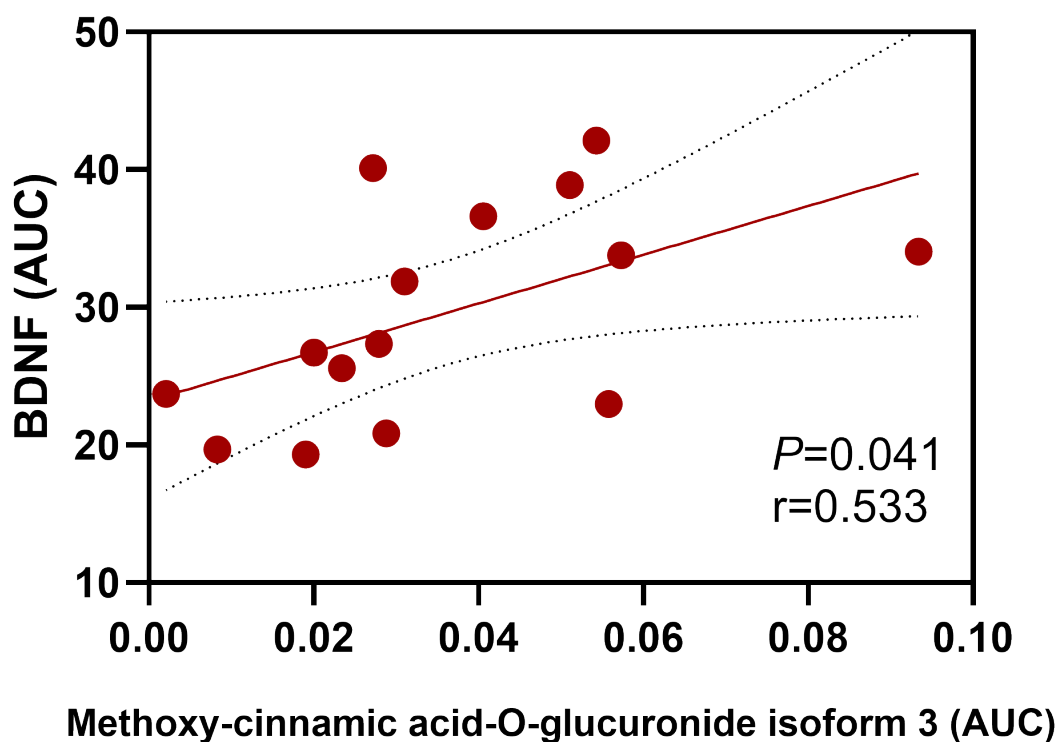

Fig. S1 The association between BDNF AUC and methoxy-cinnamic acid-O-glucuronide isoform 3 (AUC)
