# Supplementary material
Source: Royal Society of Chemistry journal article supplement (doi:10.1039/d6fo00793g)

**Consumption of an anthocyanin-rich extract increases circulating BDNF and *BDNF* gene expression in healthy subjects consuming a high fat meal**

## Supplementary files

-Uncropped western blot images

# Ponceau Staining

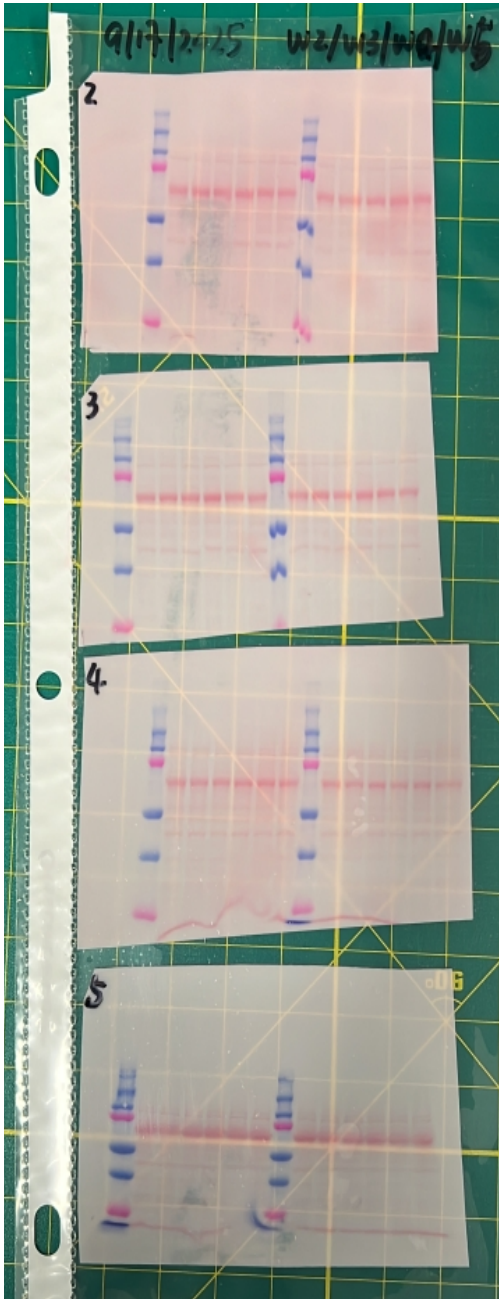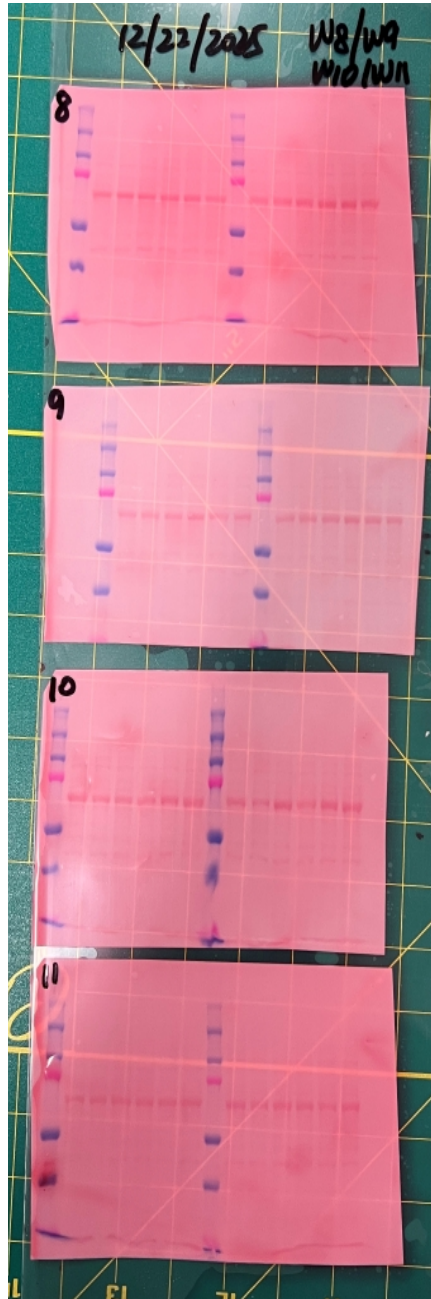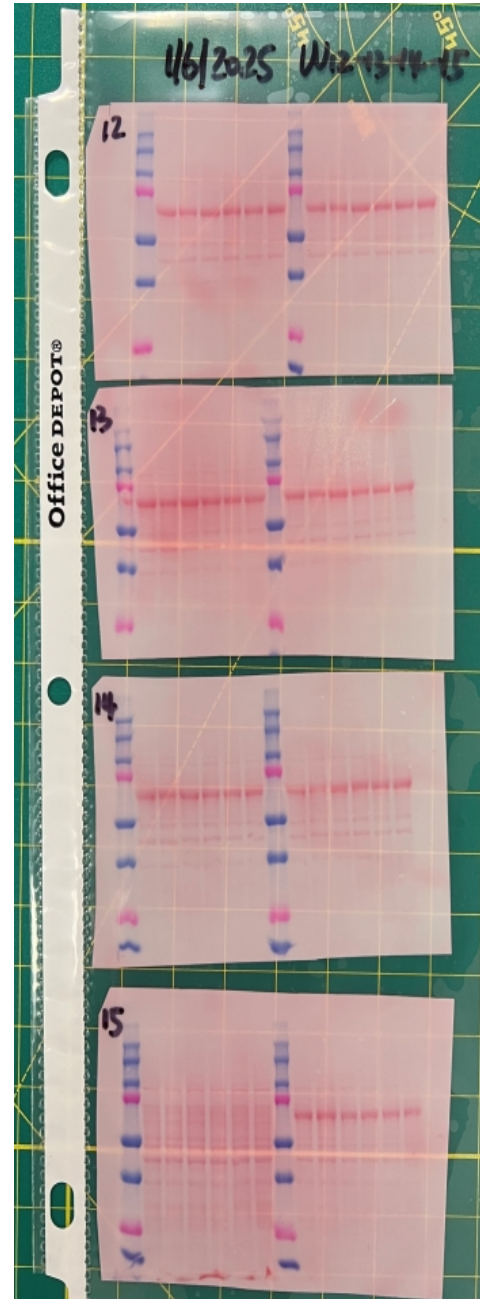

Supplement: d6fo00793g2.pdf [file d6fo00793g2.pdf]
